# Supplementary material
Source: Springer Nature journal article supplement (https://www.springerprofessional.de/resource/supplementary/13677_2012_13_MOESM10_ESM.pdf/10743464)

JADE move performance

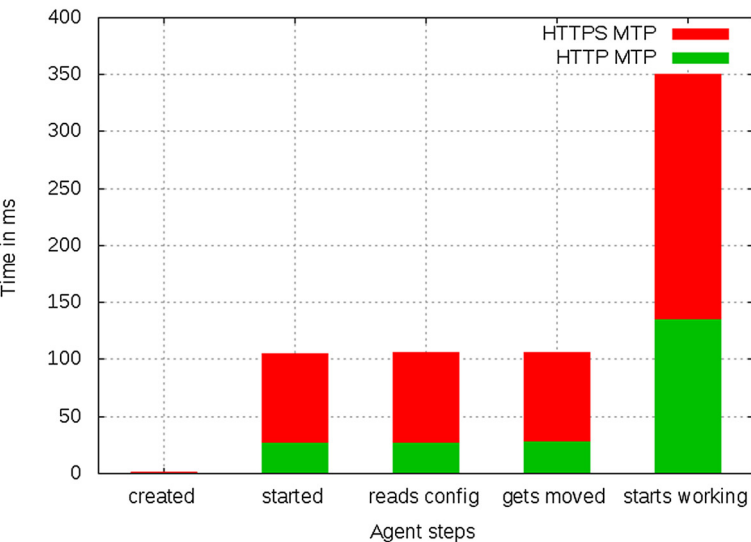

JADE messaging performance

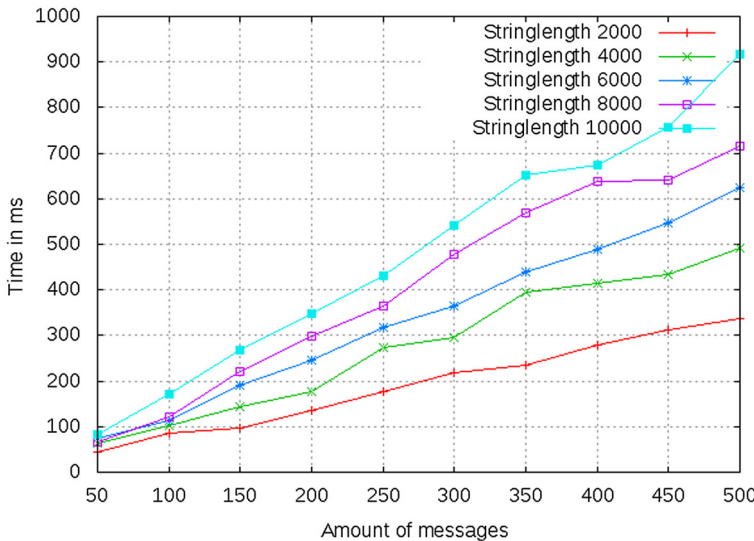

Supplement: MOESM10 [file 10743464]
